# Supplementary material for: Order vs. Disorder: Cholesterol and Omega-3 Phospholipids Determine Biomembrane Organization
Source: MDPI journal article supplement (doi:10.3390/ijms23105322), 2022-05-10
Supplement: s1 [file s1]

# Supplementary Material

To

## Order vs. disorder: cholesterol and omega-3 phospholipids determine biomembrane organization

**Augusta de Santis,<sup>1,2</sup> Ernesto Scoppola,<sup>3</sup> Maria Francesca Ottaviani,<sup>4</sup> Alexandros Koutsioubas,<sup>5</sup> Lester C Barnsley,<sup>5,6</sup> Luigi Paduano,<sup>1,2</sup> Gerardino D'Errico,<sup>1,2,\*</sup> Irene Russo Krauss<sup>1,2,\*</sup>**

<sup>1</sup> *Department of Chemical Science, University of Naples Federico II, Naples, Italy*

<sup>2</sup> *CSGI (Consorzio per lo Sviluppo dei Sistemi a Grande Interfase), Florence, Italy*

<sup>3</sup> *Max Planck Institut für Kolloid und Grenzflächenforschung, Potsdam, Germany*

<sup>4</sup> *Department of Pure and Applied Sciences, University of Urbino, Urbino, Italy*

<sup>5</sup> *Jülich Centre for Neutron Science (JCNS) at Heinz Maier-Leibnitz Zentrum (MLZ), Garching, Germany*

<sup>6</sup> *Present address: Australian Synchrotron, ANSTO, Clayton 3168, Australia*

\* Correspondence: G.D.E. [gerardino.derrico@unina.it](mailto:gerardino.derrico@unina.it); I.R.K. [irene.russokrauss@unina.it](mailto:irene.russokrauss@unina.it)

## Analysis of SANS data

In the case of the lamellar stack paracrystal model [1], the scattering intensity  $I(q)$  was calculated as

$$I(q) = 2\pi\Delta\rho^2\Gamma_m \frac{P_{bil}(q)}{q^2} Z_N(q)$$

where  $\Delta\rho$  is the contrast,  $\Gamma_m$  is the volume fraction of the material in the bilayer and  $P_{bil}$  is the form factor of the bilayer, approximated as the cross section of an infinite, planar bilayer of thickness according to

$$P_{bil}(q) = \left( \frac{\sin(qt/2)}{qt/2} \right)^2$$

Finally,  $Z_N(q)$  describes the interference effects for aggregates consisting of more than one bilayer, and depends on the number of bilayers  $N$ , the average distance between adjacent layers  $\langle D \rangle$  and the relative standard deviation of the Gaussian layer distance distribution  $\sigma D / \langle D \rangle$ .

## Analysis of NR data and error estimation

NR data were fitted by using an in-house Python software based on Metropolis Monte-Carlo with a simulated annealing algorithm.

For a given set of parameters  $\Lambda^{(i)} = (\lambda_1^{(i)}, \dots, \lambda_N^{(i)})$  a penalty function  $\chi_{(i)}^2$  as

$$\chi^2(\Lambda^{(i)}) = \chi_{(i)}^2 = \sum_{m=1}^M \left( \frac{R_e(q_{z,m}) - R_t(q_{z,m}, \Lambda^{(i)})}{\Delta R_e(q_{z,m})} \right)^2$$

representing the square distance between model and data.  $R_e(q_z)$ ,  $\Delta R_e(q_z)$ ,  $R_t(q_z, \Lambda^{(i)})$  represent the experimental data, the corresponding uncertainty and the model data, respectively. In general, the parameter set minimizing the penalty function is selected as best-fit model  $\Lambda^{(best)}$ .

In the Metropolis Monte-Carlo algorithm a link between penalty function and associated probability is defined as follows

$$P(\Lambda^{(i)}) = \exp \left[ -\frac{\chi_{(i)}^2}{E} \right]$$

and for a given  $E$  value, the larger  $\chi^2$  the smaller the probability. If the model  $\Lambda^{(i+1)}$  is obtained by a perturbation of one of the parameters  $\Lambda^{(i)}$ , the associated probability of acceptance or rejection can be calculated by the mean of the *detailed balance* such that:

$$P_{i,i+1} = P(\Lambda^{(i)} \rightarrow \Lambda^{(i+1)}) = \frac{P(\Lambda^{(i+1)})}{P(\Lambda^{(i)})} = \exp \left[ -\frac{(\chi_{(i+1)}^2 - \chi_{(i)}^2)}{E} \right]$$

It is obvious that independently of  $E$ , if  $\chi_{(i+1)}^2 \leq \chi_{(i)}^2 \Rightarrow P_{i,i+1} \geq 1$ . On the other hand, during a fitting procedure based on the Metropolis Monte-Carlo, the choice of  $E$  is relevant for accepting or rejecting the parameter set  $\Lambda^{(i+1)}$ . For this reason, in the particular case of the work presented here,  $E$  is varied with a simulated annealing approach during the fitting procedure.

Additionally, the phase space (i.e.  $\chi^2$  landscape) is defined by the parameter set, data and related uncertainties. By assuming that the minimum  $\chi_{(best)}^2$  represents the minimum in the phase space corresponding by the best-match parameter set  $\Lambda^{(best)}$ , we can define the normalized probability of each  $\Lambda^{(i)}$  tested during the fitting procedure as

$$\tilde{P}(\Lambda^{(i)}) = \frac{P(\Lambda^{(i)})}{P(\Lambda^{(best)})} = \exp \left[ -\frac{\chi_{(i)}^2}{\chi_{(best)}^2} \right] \cdot \exp \left[ \frac{\chi_{(best)}^2}{\chi_{(best)}^2} \right] = \exp \left[ -\frac{(\chi_{(i)}^2 - \chi_{(best)}^2)}{\chi_{(best)}^2} \right]$$

The latter equation becomes a powerful tool for the estimation of parameters uncertainties allowing the definition of the probability associated to a given parameter set tested during the fitting procedure. Moreover, in combination with the Metropolis Monte-Carlo and Simulated annealing algorithms with a random exploration of parameters, it is possible to define probability maps for those observables resulting from the combination of several parameters. This approach represents a self-consistent method for parameter uncertainties estimation based on the Metropolis Monte-Carlo definition of probabilities.

**Table S1** Hyperfine coupling constant  $A$ , order parameter  $S$  and correlation time  $\tau$ , for 5-PCSL, 14-PCSL and CNO as derived from EPR spectra simulation. Errors are within 1%.

|                                   |                    | 5-PCSL |         |             | 14-PCSL |         |             | CNO   |         |             |
|-----------------------------------|--------------------|--------|---------|-------------|---------|---------|-------------|-------|---------|-------------|
|                                   |                    | A (G)  | S       | $\tau$ (ns) | A (G)   | S       | $\tau$ (ns) | A (G) | S       | $\tau$ (ns) |
| <b>chol/POPC</b>                  | X22:6-22:6PC = 0   | 14.67  | 0.48598 | 11.0        | 14.10   | 0.27944 | 3.0         | 14.33 | 0.23    | 0.33        |
|                                   | X18:0-22:6PC = 0   |        |         |             |         |         |             |       |         |             |
| <b>chol/POPC/<br/>22:6-22:6PC</b> | X22:6-22:6PC = 0.2 | 14.67  | 0.4785  | 10.8        | 14.10   | 0.26729 | 2.8         | 14.33 | 0.227   | 0.33        |
|                                   | X22:6-22:6PC = 0.4 | 14.67  | 0.4785  | 10.8        | 14.10   | 0.26449 | 2.5         | 14.33 | 0.218   | 0.33        |
|                                   | X22:6-22:6PC = 0.5 | 14.67  | 0.4757  | 10.73       | 14.10   | 0.26075 | 2.3         | 14.33 | 0.21    | 0.33        |
|                                   | X22:6-22:6PC = 0.6 | 14.67  | 0.47009 | 10.6        | 14.10   | 0.25607 | 2.1         | 14.33 | 0.205   | 0.33        |
|                                   | X22:6-22:6PC = 0.8 | 14.67  | 0.43832 | 10.3        | 14.10   | 0.22897 | 1.0         | 14.33 | 0.195   | 0.33        |
|                                   |                    |        |         |             |         |         |             |       |         |             |
| <b>chol/22:6-<br/>22:6PC</b>      | X22:6-22:6PC = 1   | 14.67  | 0.40561 | 10.0        | 14.10   | 0.2     | 0.08        | 14.33 | 0.17    | 0.33        |
| <b>chol/POPC/<br/>18:0-22:6PC</b> | X18:0-22:6PC = 0.2 | 14.67  | 0.48411 | 10.8        | 14.10   | 0.27904 | 3.0         | 14.33 | 0.23052 | 0.33        |
|                                   | X18:0-22:6PC = 0.4 | 14.67  | 0.48318 | 10.7        | 14.10   | 0.2785  | 2.95        | 14.33 | 0.228   | 0.33        |
|                                   | X18:0-22:6PC = 0.5 | 14.67  | 0.48318 | 10.7        | 14.10   | 0.2785  | 2.9         | 14.33 | 0.2274  | 0.33        |
|                                   | X18:0-22:6PC = 0.6 | 14.67  | 0.48318 | 10.7        | 14.10   | 0.2785  | 2.9         | 14.33 | 0.22745 | 0.33        |
|                                   | X18:0-22:6PC = 0.8 | 14.67  | 0.48318 | 10.7        | 14.10   | 0.27664 | 2.9         | 14.33 | 0.22614 | 0.33        |
|                                   |                    |        |         |             |         |         |             |       |         |             |
| <b>chol/18:0-<br/>22:6PC</b>      | X18:0-22:6PC = 1   | 14.67  | 0.48411 | 10.8        | 14.10   | 0.26636 | 2.85        | 14.33 | 0.22338 | 0.33        |

**Table S2** Scattering Length Densities (SLDs) and Molecular Volumes (V) used as input values for the Neutron Reflectivity fitting procedure.

| Molecule                | Chemical Formula                                  | SLD [ $10^{-6} \text{ \AA}^{-2}$ ] | V [ $\text{\AA}^3$ ] |
|-------------------------|---------------------------------------------------|------------------------------------|----------------------|
| Heavy Water             | D <sub>2</sub> O                                  | 6.3752                             | 30.0428              |
| Light Water             | H <sub>2</sub> O                                  | -0.5594                            | 29.9757              |
| POPC (Tail)             | C <sub>32</sub> H <sub>64</sub>                   | -0.2899                            | 919.614              |
| POPC (Headgroup)        | C <sub>10</sub> H <sub>18</sub> PO <sub>8</sub> N | 1.8652                             | 322.100              |
| Cholesterol (Tail)      |                                                   |                                    |                      |
| Cholesterol (Headgroup) |                                                   |                                    |                      |
| 22:6-22:6PC (Tail)      | C <sub>42</sub> H <sub>62</sub>                   | 0.6543                             | 722.940              |
| 22:6-22:6PC (Headgroup) | C <sub>10</sub> H <sub>18</sub> PO <sub>8</sub> N | 1.8652                             | 322.100              |
| 18:0-22:6PC (Tail)      |                                                   |                                    |                      |
| 18:0-22:6PC (Headgroup) | C <sub>10</sub> H <sub>18</sub> PO <sub>8</sub> N | 1.8652                             | 322.100              |
| Silicon                 | Si                                                | 2.0754                             | 20.000               |
| Silicon Oxide           | SiO <sub>2</sub>                                  | 3.2698                             | 48.200               |

POPC

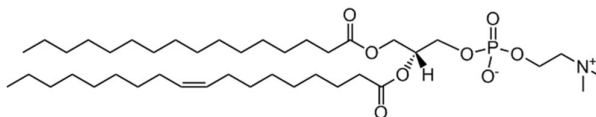

Cholesterol

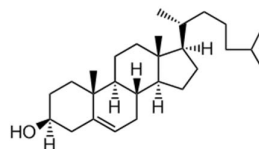

18:0-22:6PC

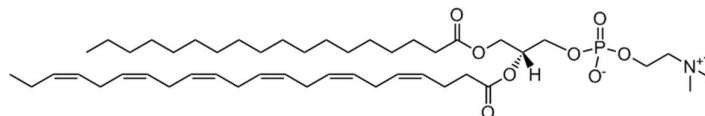

22:6-22:6PC

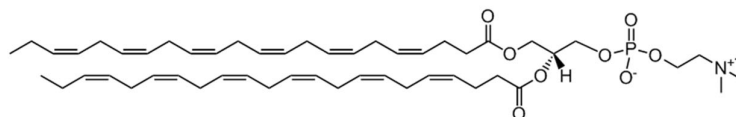

**Figure S1** Chemical structure of the natural lipids employed in this study: 1-palmitoyl-2-oleoyl-sn-glycero-3-phosphocholine (POPC), cholesterol, 1-stearoyl-2-docosahexaenoyl-sn-glycero-3-phosphocholine (18:0-22:6PC), 1,2-didocosahexaenoyl-sn-glycero-3-phosphocholine (22:6-22:6PC)

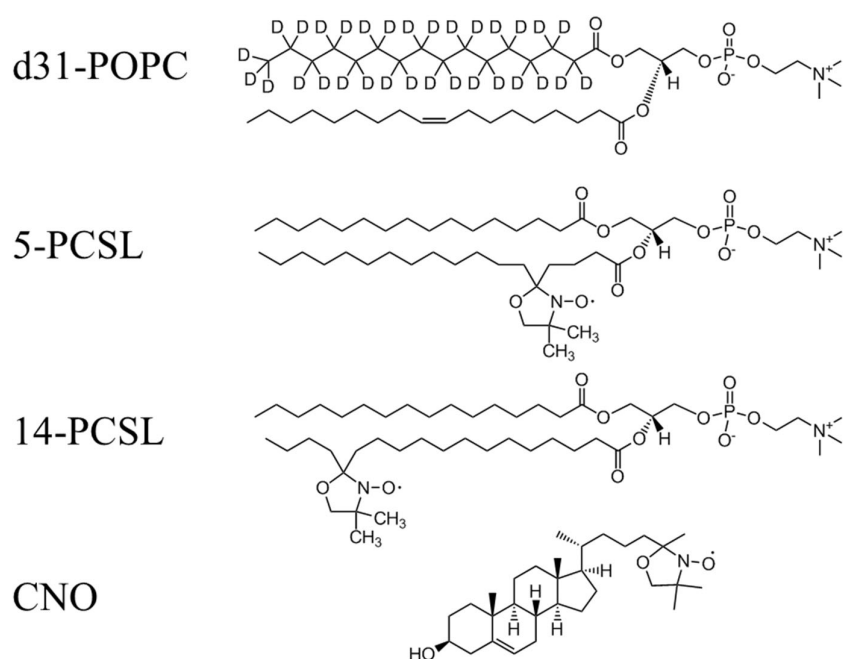

**Figure S2** Chemical structure of the lipid probes employed in this study: 1-palmitoyl-d31-2-oleoyl-sn-glycero-3-phosphocholine (d31-POPC), 1-palmitoyl-2-stearoyl-(5-doxyl)-sn-glycero-3-phosphocholine (5-PCSL), 1-palmitoyl-2-stearoyl-(14-doxyl)-sn-glycero-3-phosphocholine (14-PCSL), 25-doxyl-cholesterol (CNO)

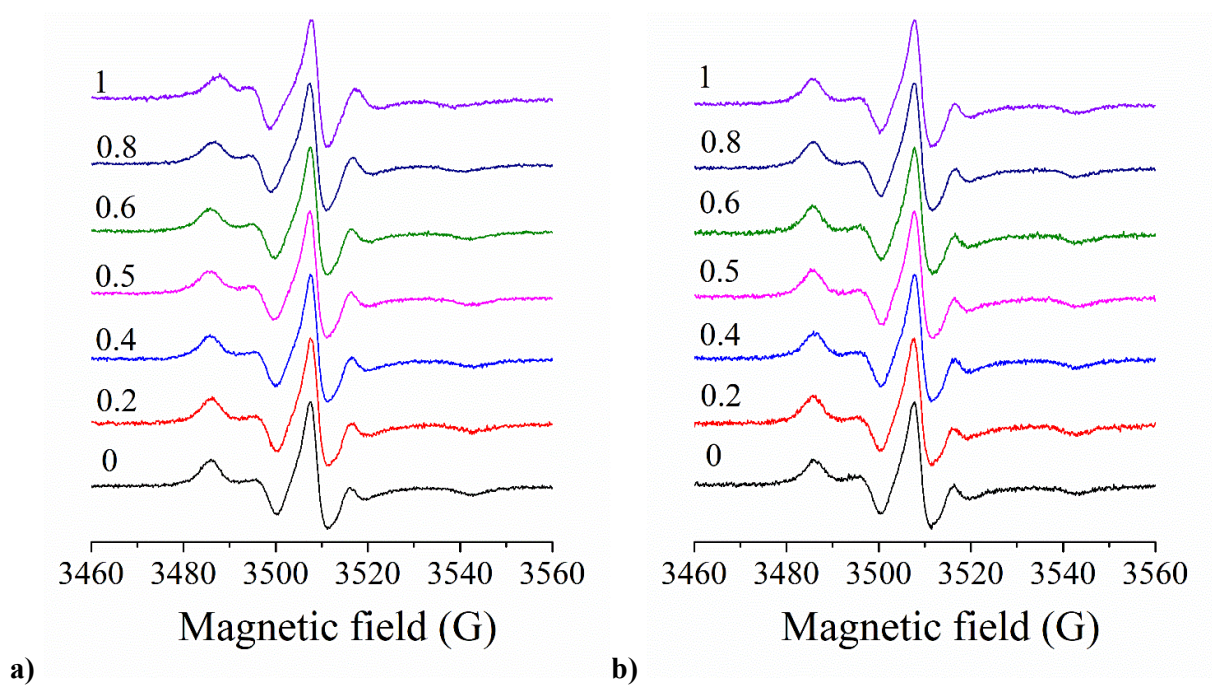

**Figure S3** EPR spectra of 5-PCSL in (a) chol/POPC/22:6-22:6PC and (b) chol/POPC/18:0-22:6PC systems with x<sub>22:6-22:6PC</sub> and x<sub>18:0-22:6PC</sub> ranging from 0 to 1.



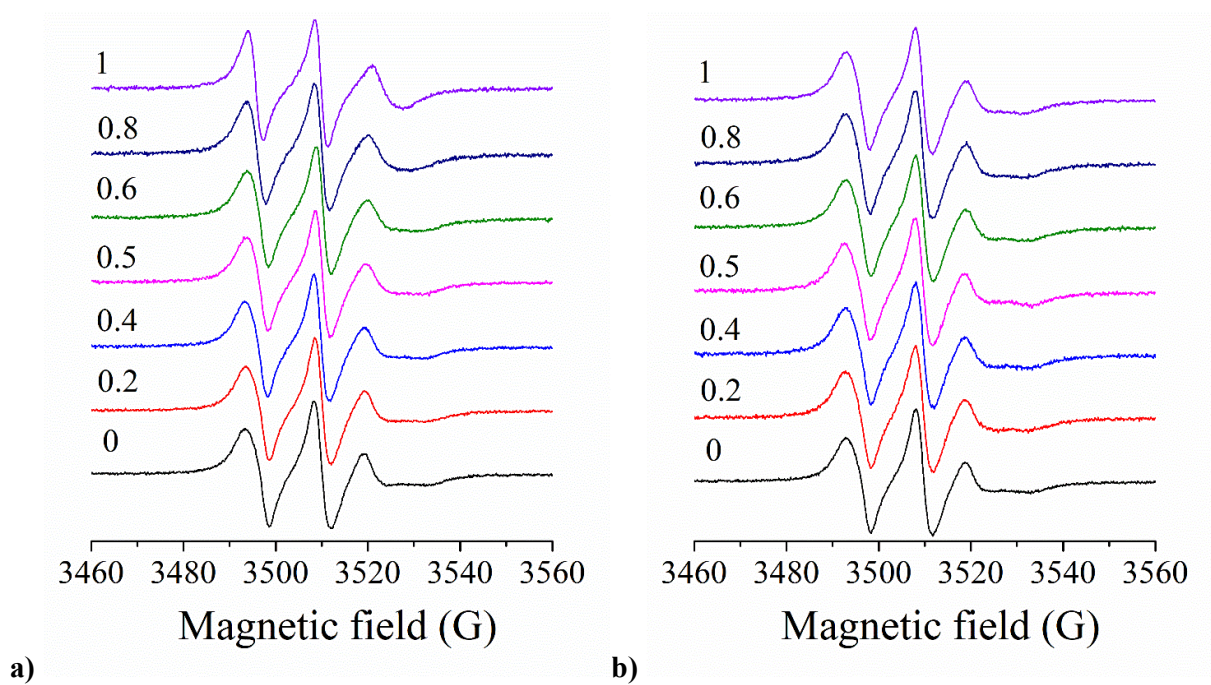

**Figure S4** EPR spectra of 14-PCSL in (a) chol/POPC/22:6-22:6PC and (b) chol/POPC/18:0-22:6PC systems with x<sub>22:6-22:6PC</sub> and x<sub>18:0-22:6PC</sub> ranging from 0 to 1.

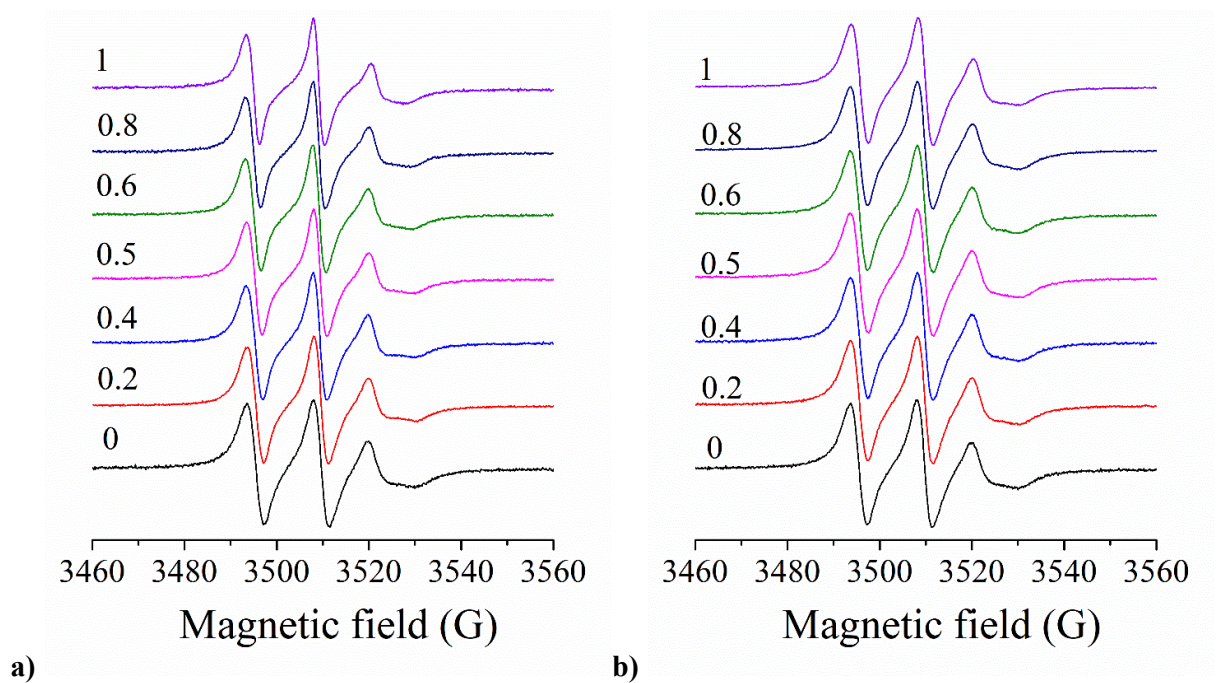

**Figure S5** EPR spectra of CNO in (a) chol/POPC/22:6-22:6PC and (b) chol/POPC/18:0-22:6PC systems with X<sub>22:6-22:6PC</sub> and X<sub>18:0-22:6PC</sub> ranging from 0 to 1.

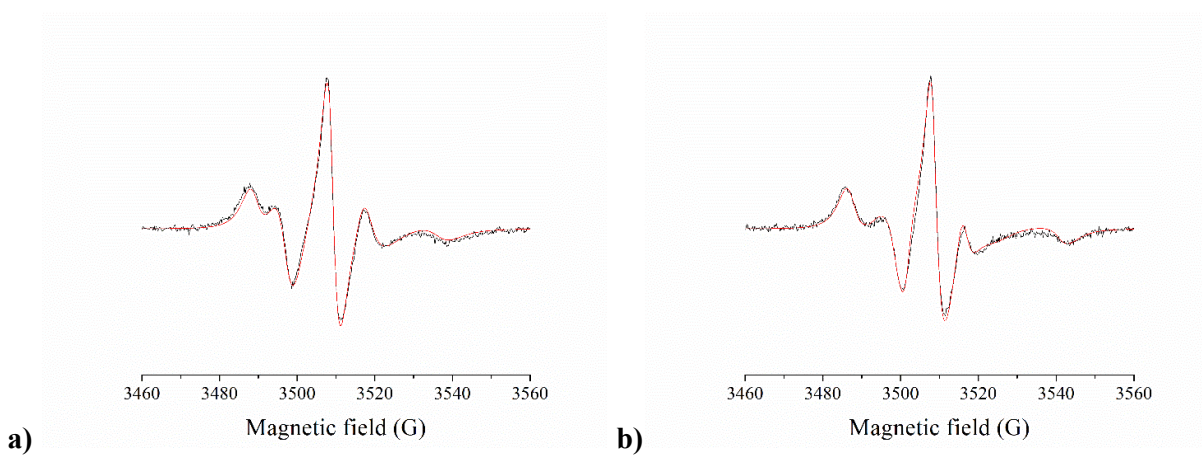

**Figure S6** Comparison between experimental (black lines) and computed (red lines) EPR spectra of 5-PCSL in **(a)** chol/22:6-22:6PC and **(b)** chol/18:0-22:6PC systems.

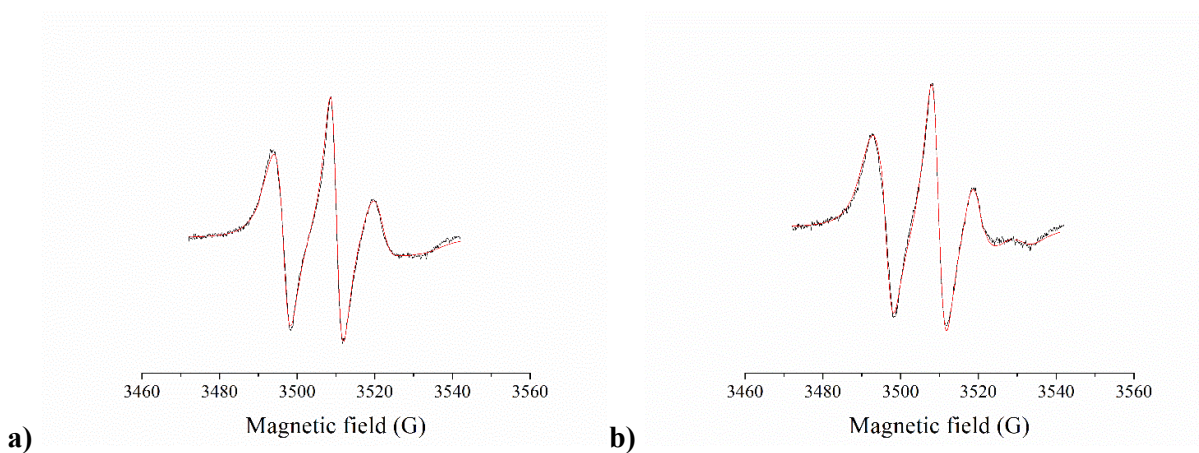

**Figure S7** Comparison between experimental (black lines) and computed (red lines) EPR spectra of 14-PCSL in (a) chol/POPC/22:6-22:6PC with  $x_{22:6-22:6PC}=0.5$  and (b) chol/POPC/18:0-22:6PC with  $x_{18:0-22:6PC}=0.5$  systems.

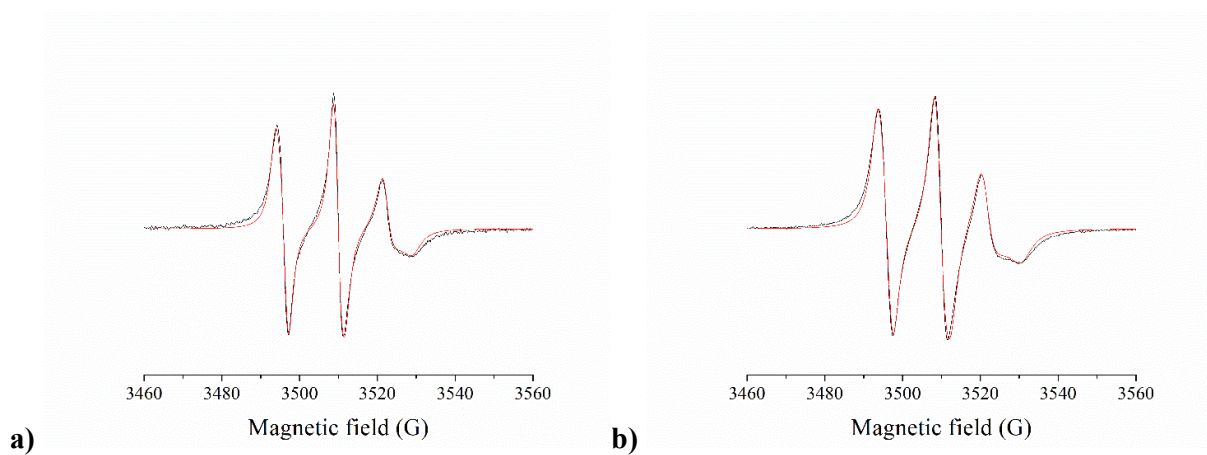

**Figure S8** Comparison between experimental (black lines) and computed (red lines) EPR spectra of CNO in (a) chol/22:6-22:6PC and (b) chol/18:0-22:6PC systems.

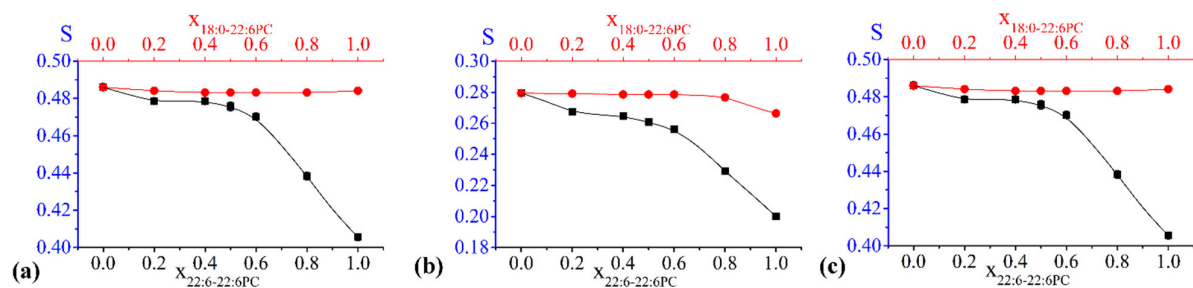

**Figure S9** Comparison between  $S$  variation as a function of omega-3 phospholipid concentration for chol/POPC/22:6-22:6PC (black) and chol/POPC/18:0-22:6PC (red) systems as obtained by means of (a) 5-PCSL, (b) 14PCSL, (c) CNO.



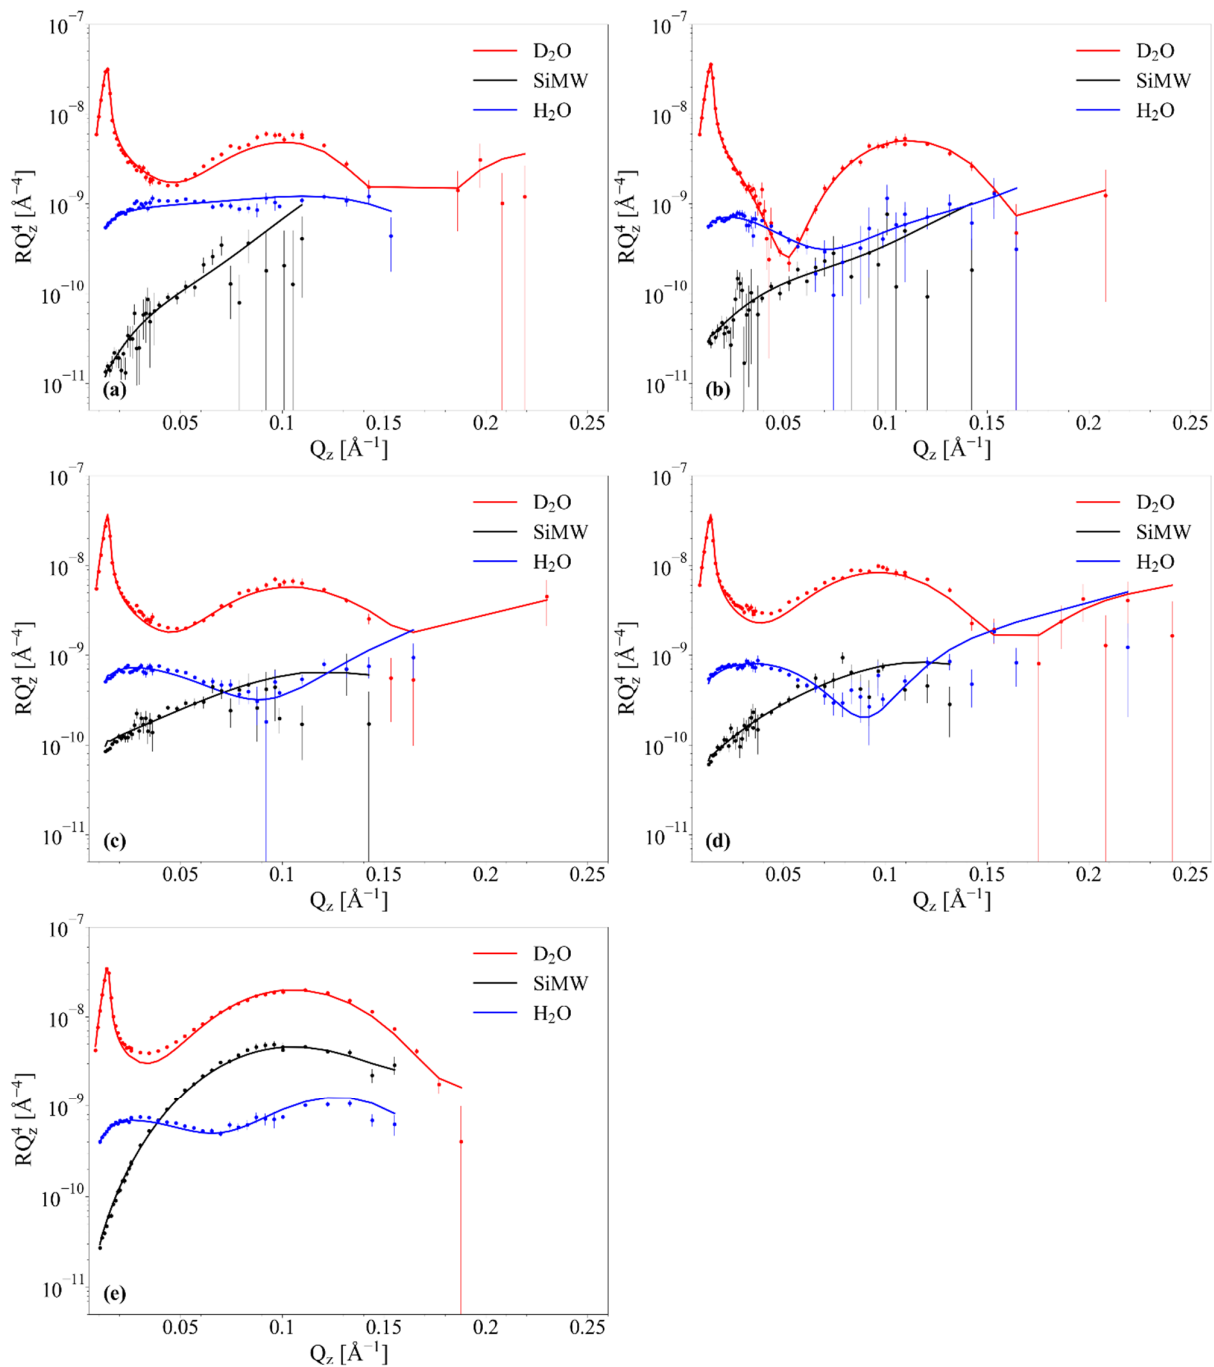

**Figure S10** Fresnel representation  $RQ^4$  vs  $Q$  of experimental data and best fitting curves in  $D_2O$  (red), silicon match water (black) and  $H_2O$  (blue) for lipid systems: (a) chol/POPC, (b) chol/POPC/22:6-22:6PC  $x_{22:6-22:6PC} = 0.2$ , (c) chol/POPC/22:6-22:6PC  $x_{22:6-22:6PC} = 0.8$ , (d) chol/POPC/18:0-22:6PC  $x_{18:0-22:6PC} = 0.4$ , (e) POPC/18:0-22:6PC.

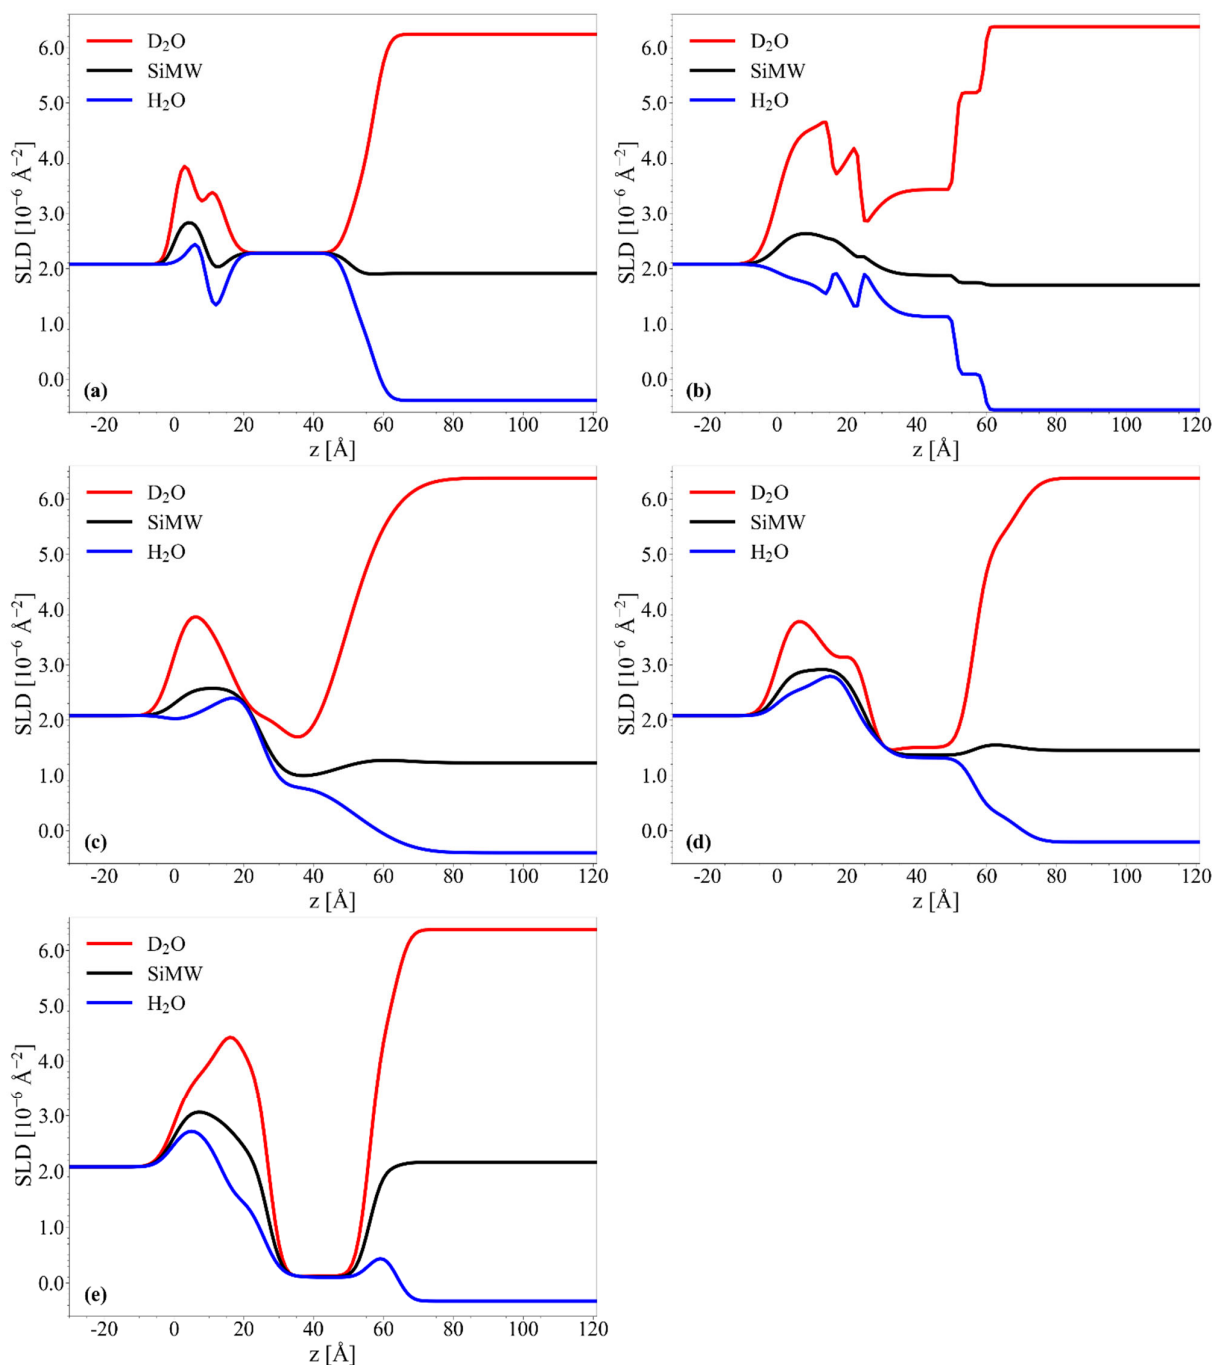

**Figure S11** SLD profiles corresponding to best fit of Neutron Reflectivity data in D<sub>2</sub>O (red), silicon match water (black) and H<sub>2</sub>O (blue) for lipid systems: (a) chol/POPC, (b) chol/POPC/22:6-22:6PC  $x_{22:6-22:6PC} = 0.2$ , (c) chol/POPC/22:6-22:6PC  $x_{22:6-22:6PC} = 0.8$ , (d) chol/POPC/18:0-22:6PC  $x_{18:0-22:6PC} = 0.4$ , (e) POPC/18:0-22:6PC.



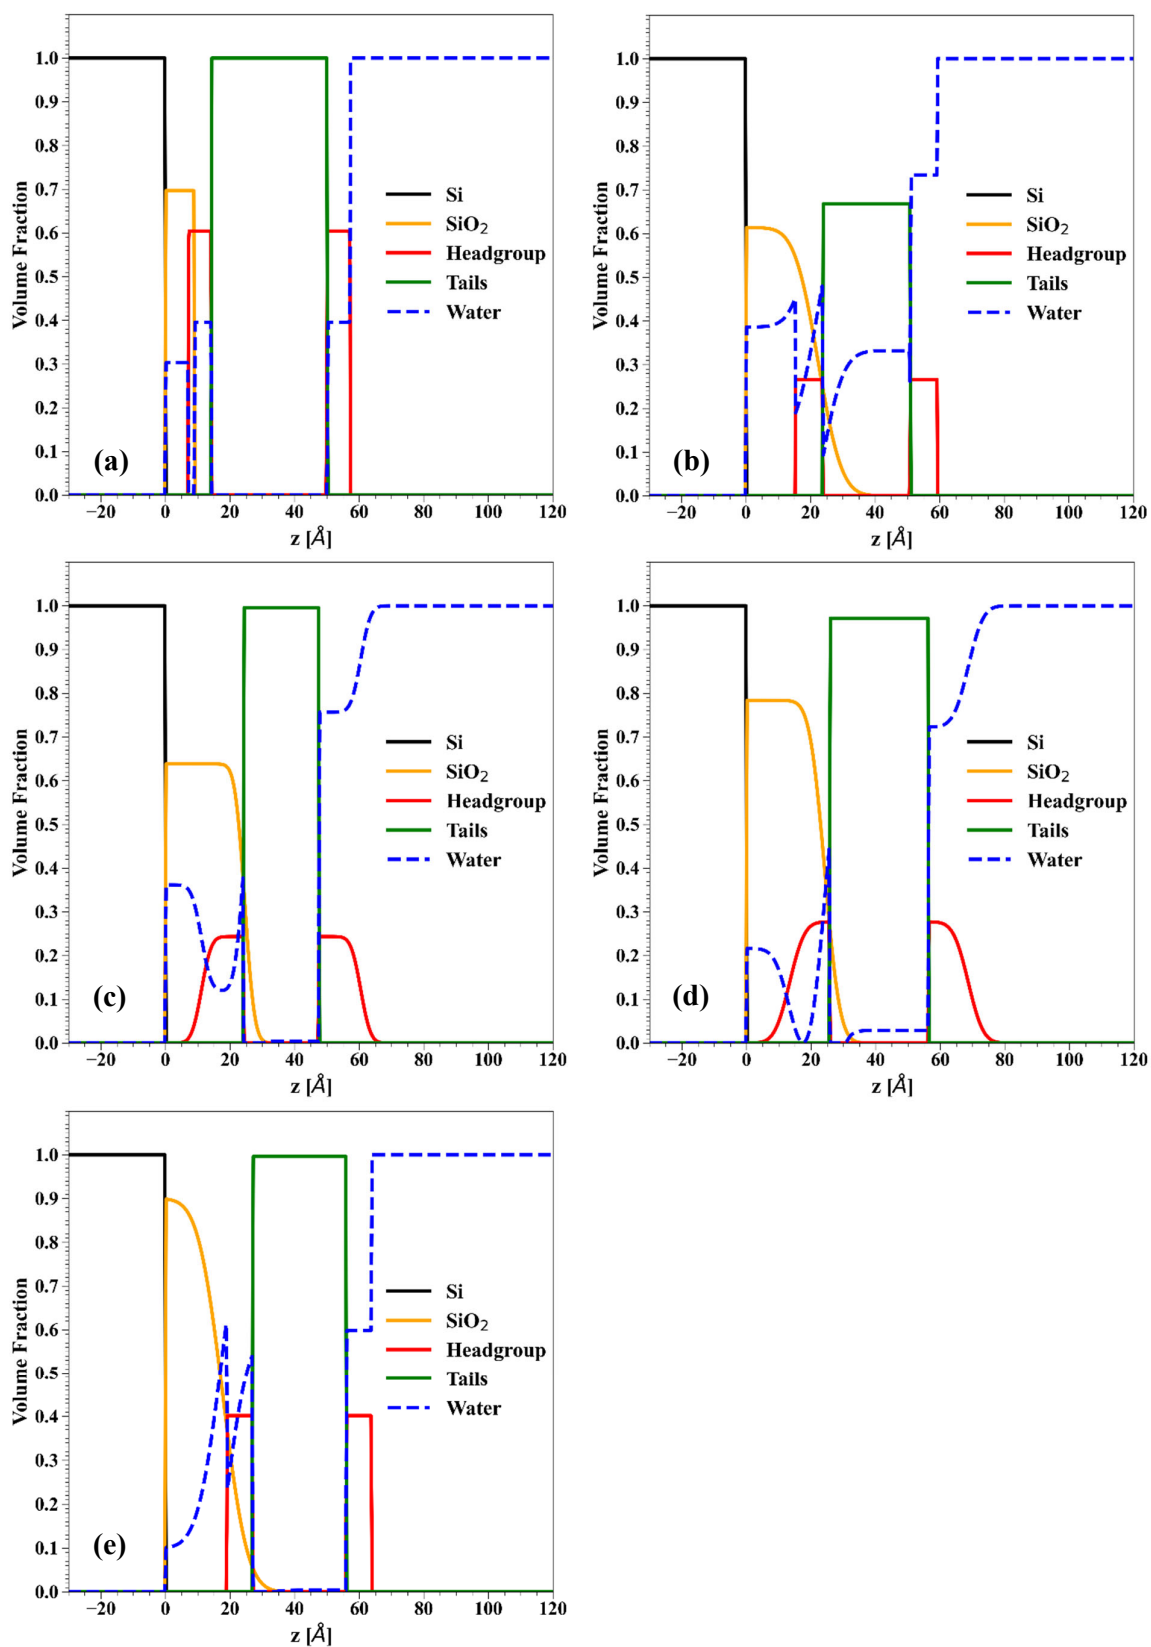

**Figure S12** Convolved volume fraction distribution profiles for (a) chol/POPC, (b) chol/POPC/22:6-22:6PC  $x_{22:6-22:6PC} = 0.2$ , (c) chol/POPC/22:6-22:6PC  $x_{22:6-22:6PC} = 0.8$ , (d) chol/POPC/18:0-22:6PC  $x_{18:0-22:6PC} = 0.4$ , (e) POPC/18:0-22:6PC.

[1] M. Kotlarchyk, S.M. Ritzau, Paracrystal Model of the High-Temperature Lamellar Phase of a Ternary Microemulsion System, J Appl Crystallogr 24 (1991) 753-758, Doi 10.1107/S0021889890012213.
